# Supplementary material for: Theoretical exploration of the cooperative effect in NMF–NMF–amino acid residue hydrogen bonding system
Source: Royal Society of Chemistry journal article supplement (doi:10.1039/b804291h), 2008-01-01
Supplement: b804291h.pdf [file b804291h.pdf]

## 1. Geometric configurations.

1

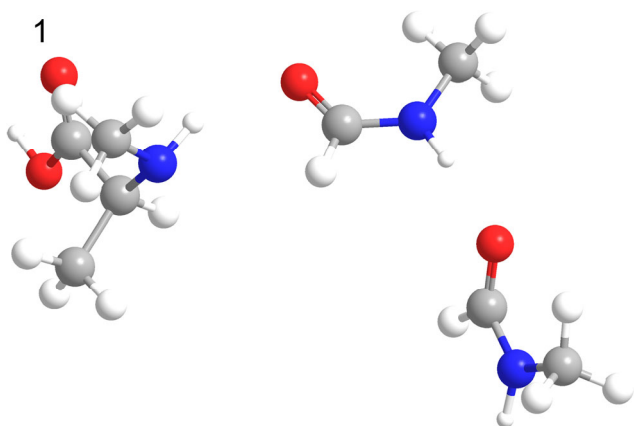

2

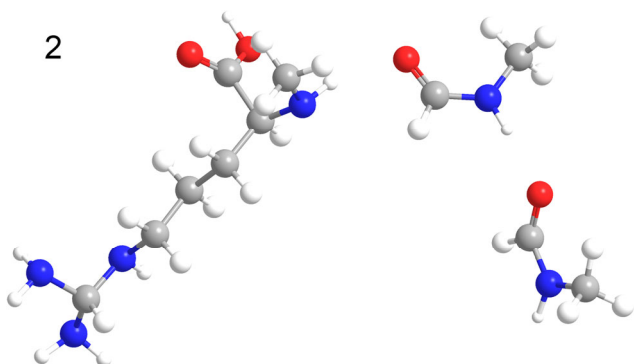

5

3

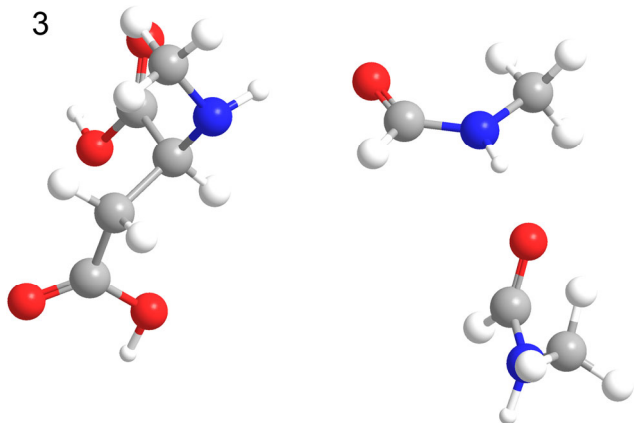

4

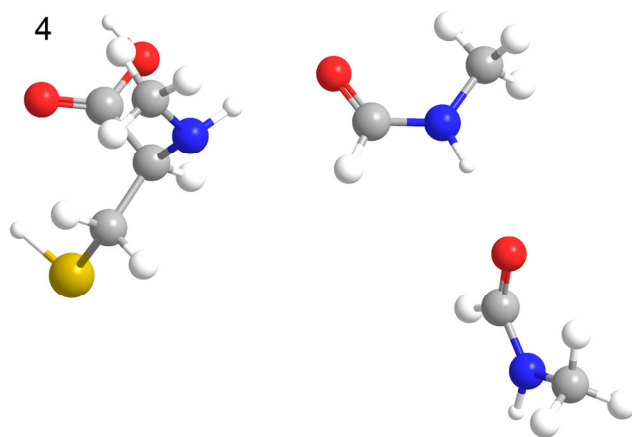

5

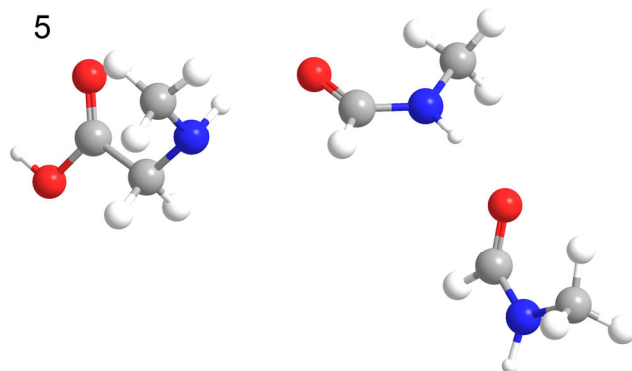

10

6

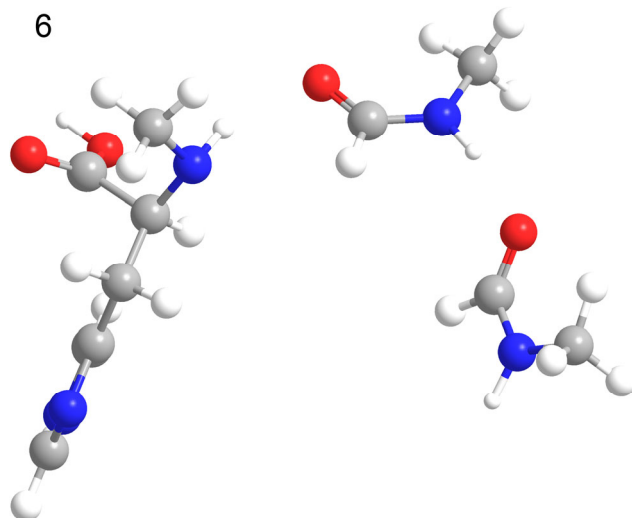

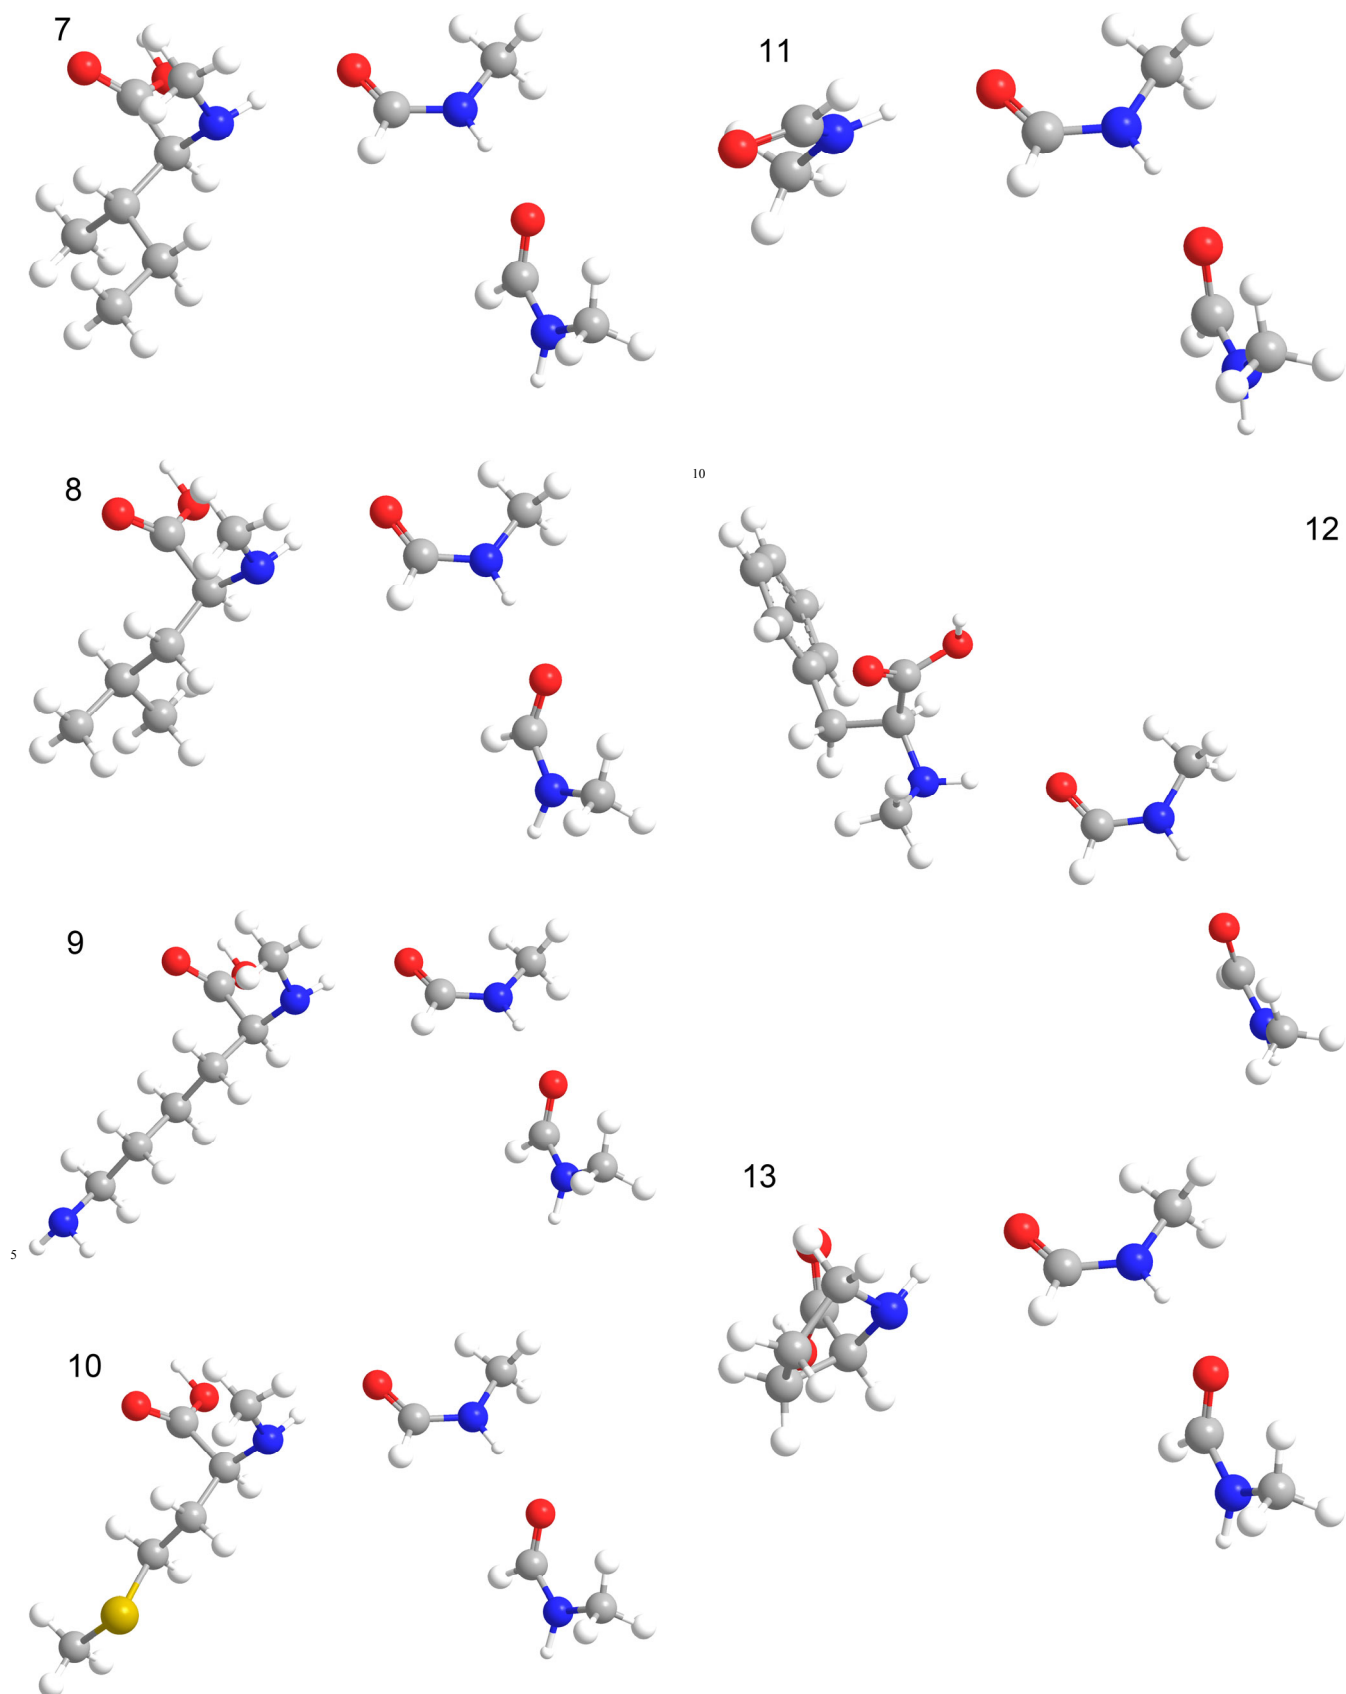

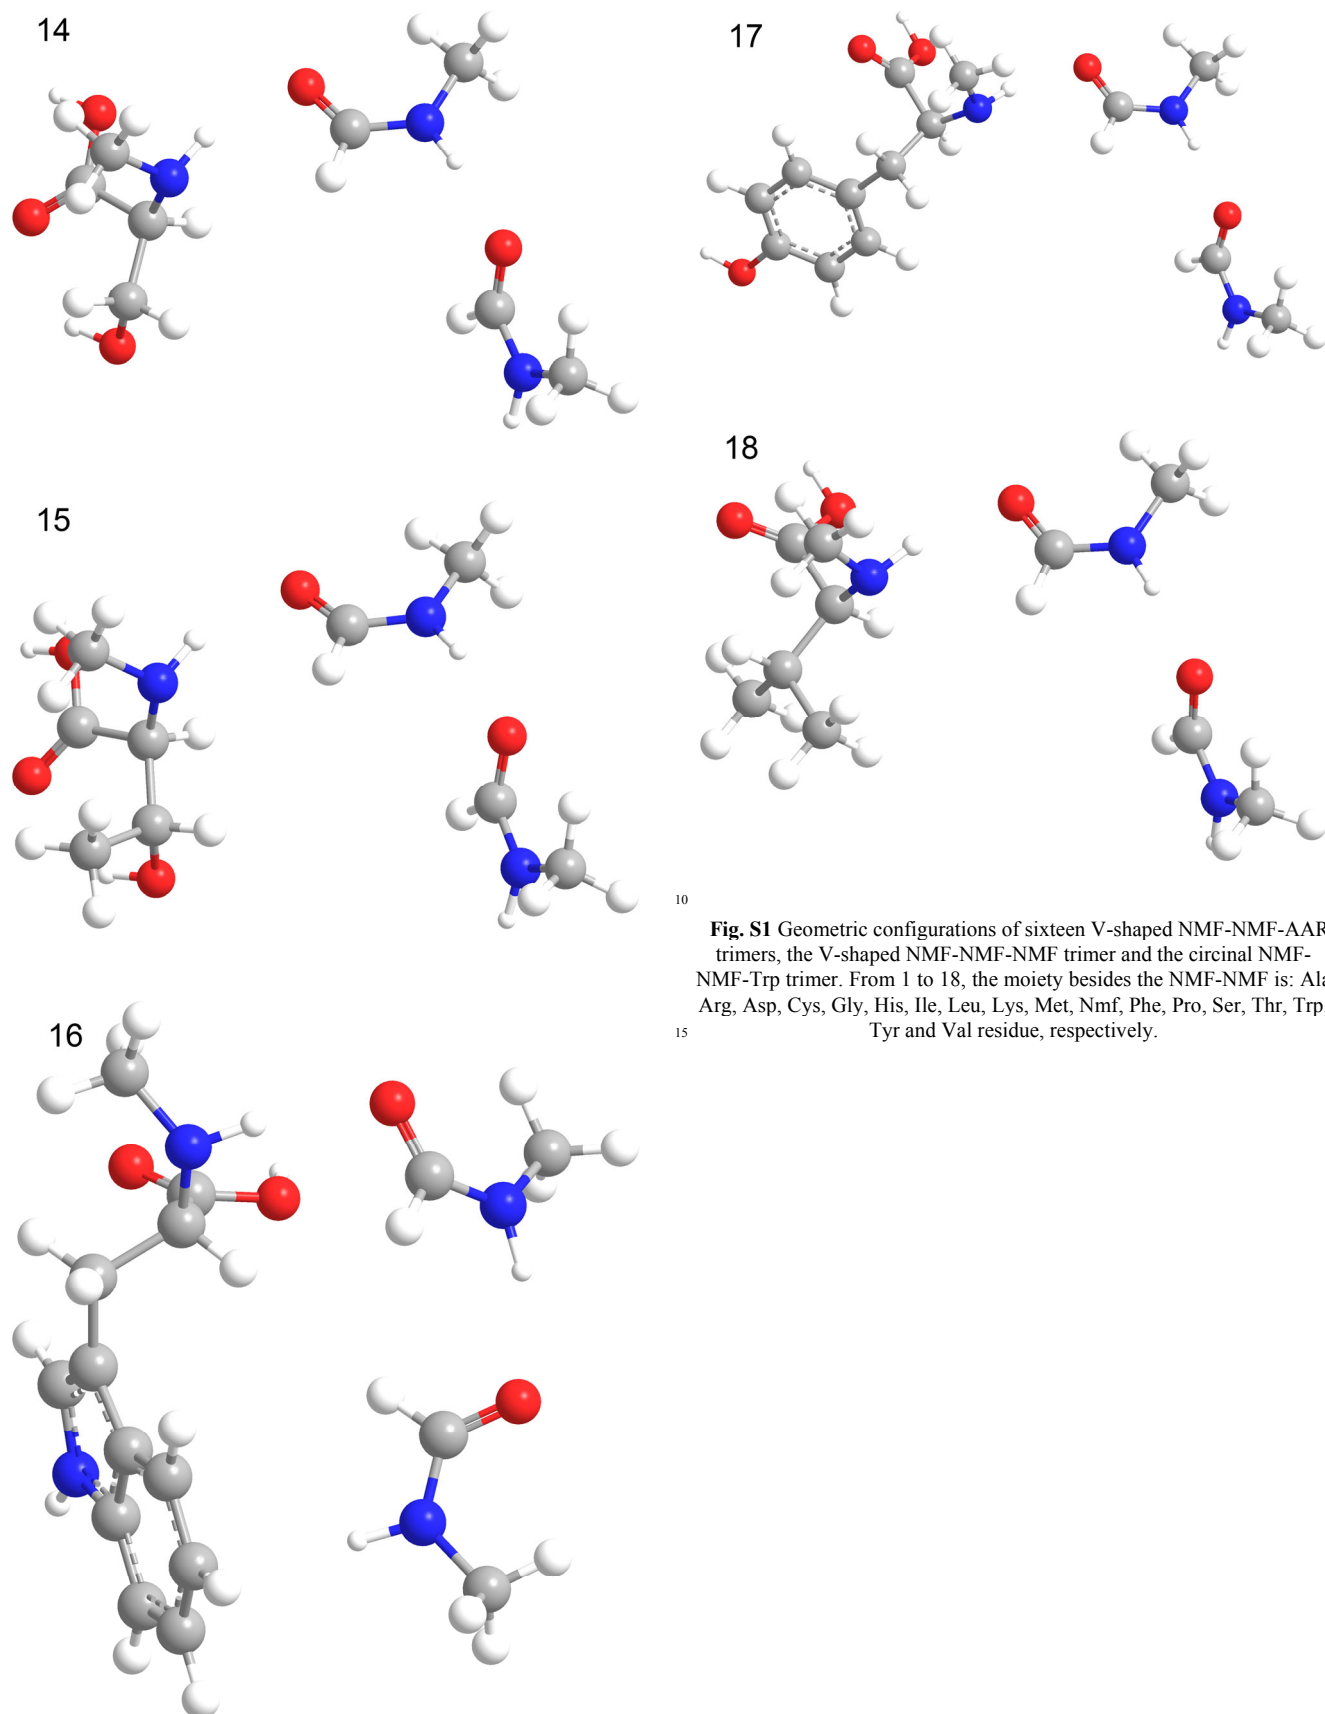

**Fig. S1** Geometric configurations of sixteen V-shaped NMF-NMF-AAR trimers, the V-shaped NMF-NMF-NMF trimer and the circinal NMF-NMF-Trp trimer. From 1 to 18, the moiety besides the NMF-NMF is: Ala, Arg, Asp, Cys, Gly, His, Ile, Leu, Lys, Met, Nmf, Phe, Pro, Ser, Thr, Trp, Tyr and Val residue, respectively.
